# Supplementary material for: Virtual assessment achieved two binary cocrystals based on a liquid and a solid pyridine derivative with modulated thermal stabilities
Source: Royal Society of Chemistry journal article supplement (doi:10.1039/d3ce00608e), 2023-01-01
Supplement: d3ce00608e1.pdf [file d3ce00608e1.pdf]

## Supporting Information

Virtual assessment achieved two binary cocrystals  
based on a liquid and a solid pyridine derivative with  
modulated thermal stabilities

*Daniel Ejarque<sup>a</sup>, Teresa Calvet<sup>b</sup>, Mercè Font-Bardia<sup>c</sup>, and Josefina Pons<sup>a,\*</sup>*

<sup>a</sup>Departament de Química, Universitat Autònoma de Barcelona, 08193-Bellaterra, Barcelona, Spain

<sup>b</sup>Departament de Mineralogia, Petrologia i Geologia Aplicada, Universitat de Barcelona, Martí i Franquès s/n, 08028 Barcelona, Spain

<sup>c</sup>Unitat de Difracció de Raig-X, Centres Científics i Tecnològics de la Universitat de Barcelona (CCiTUB), Universitat de Barcelona, Solé i Sabarís, 1-3, 08028 Barcelona, Spain

\*Corresponding author E-mail: josefina.pons@uab.es

## PXRD patterns

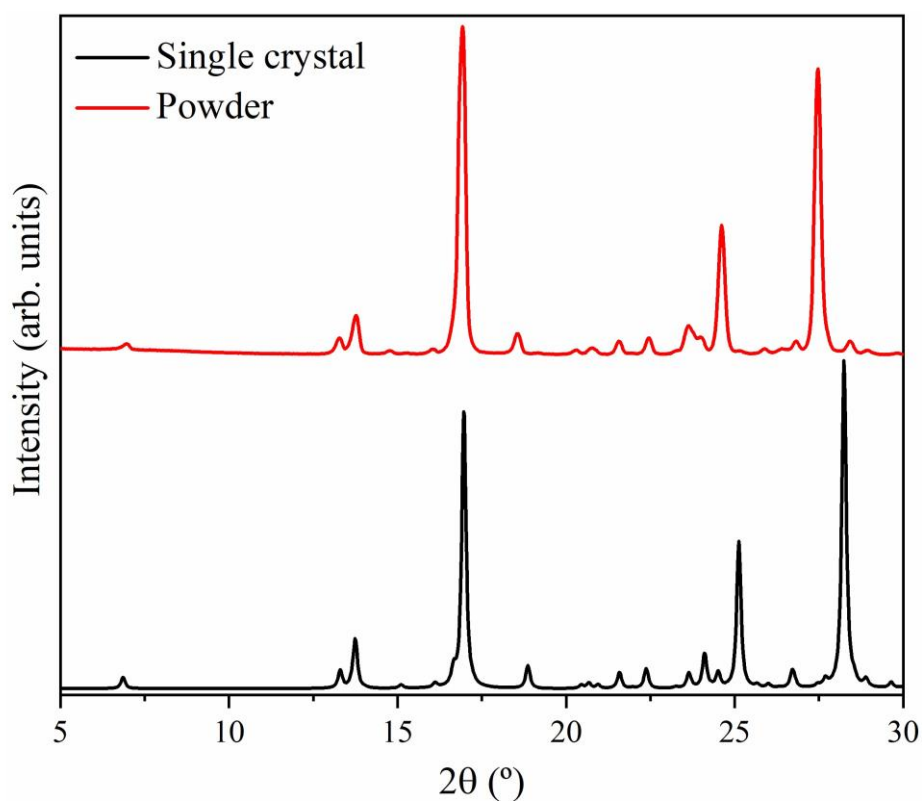

Figure S1. XRD pattern from the single crystal collected data at 100 K and powder XRD pattern at 298 K of cocystal (HPip)(4-AcPy) (**1**).

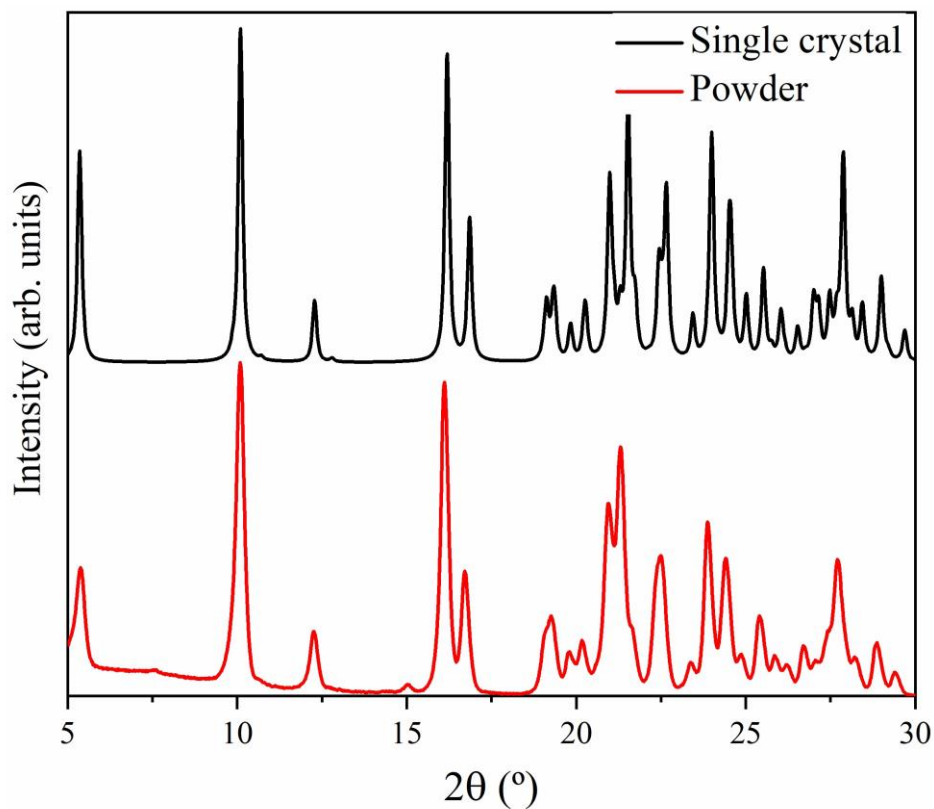

Figure S2. XRD pattern from the single crystal collected data at 100 K and powder XRD pattern at 298 K of cocystal (HACA)(Pdon) (**2**).

## FTIR-ATR and NMR spectroscopies

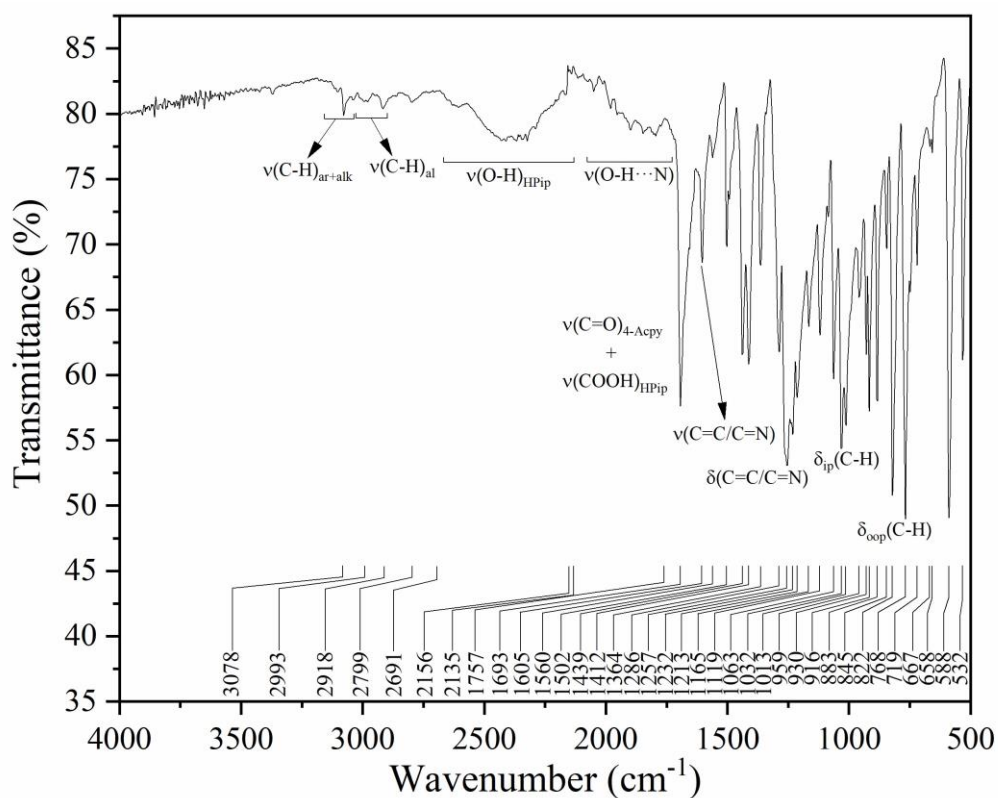

Figure S3. FTIR-ATR spectrum of cocystal (HPip)(4-Acpy) (**1**).

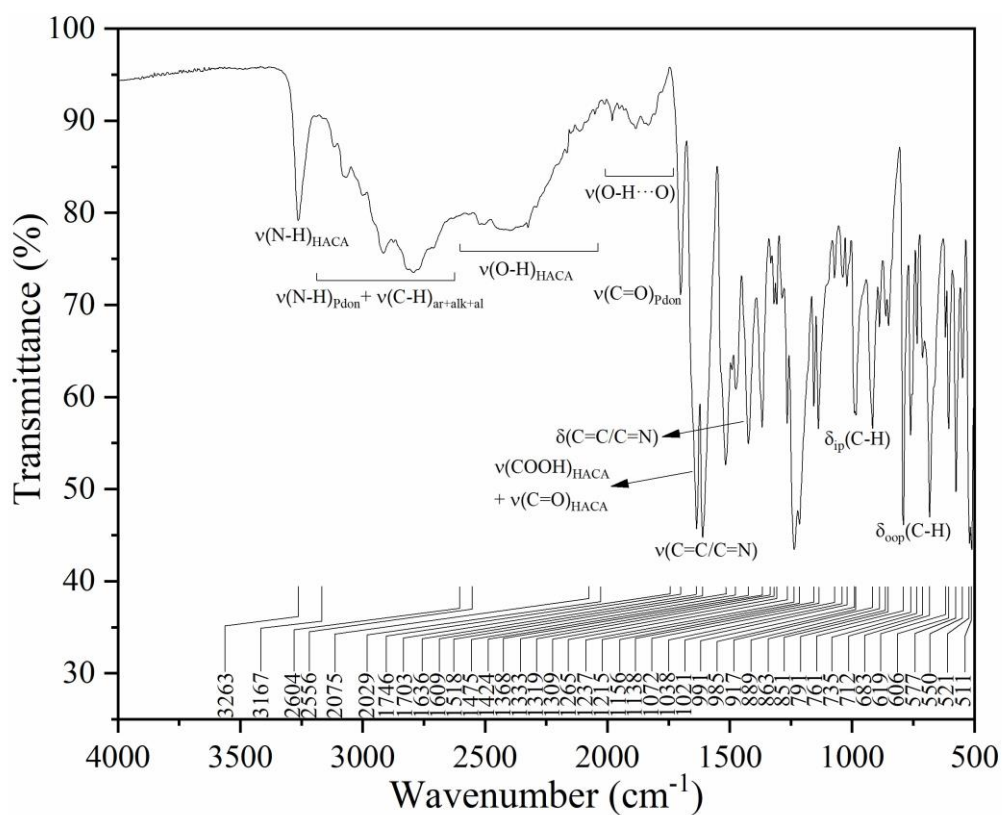

Figure S4. FTIR-ATR spectrum of cocystal (HACA)(Pdon) (**2**).

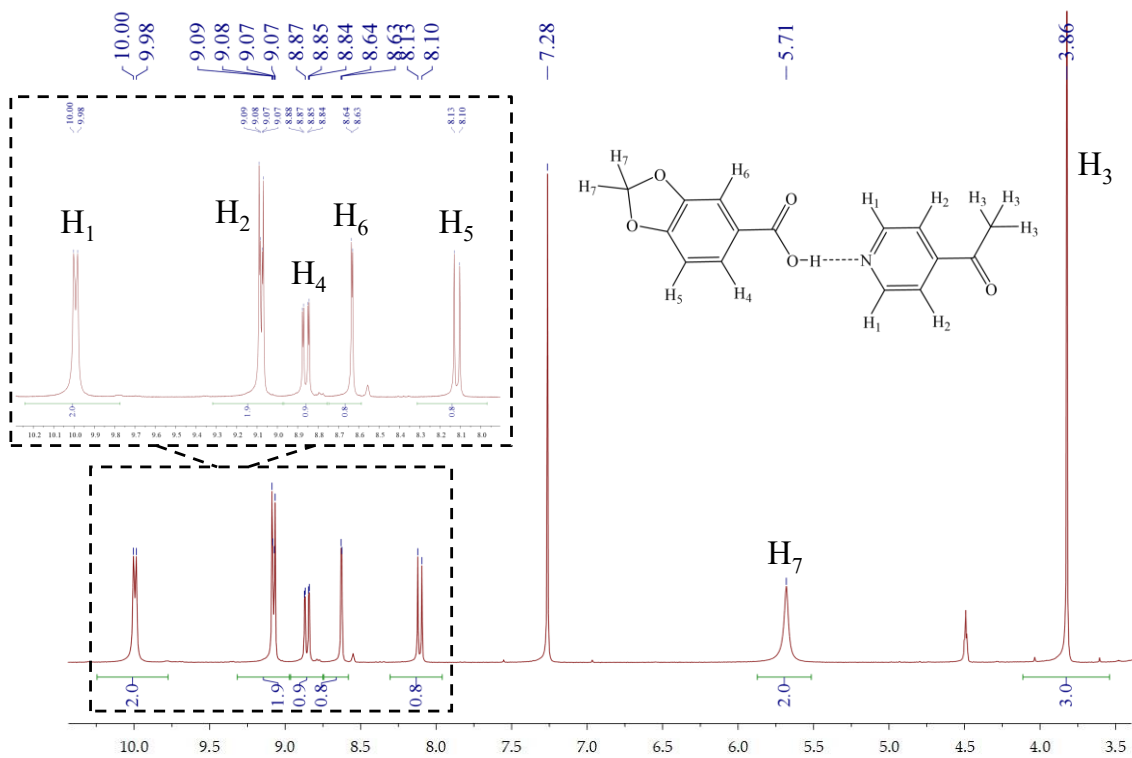

Figure S5. <sup>1</sup>H NMR spectrum of cocystal (HPip)(4-AcPy) (**1**) recorded at 298 K in CD<sub>3</sub>OD.

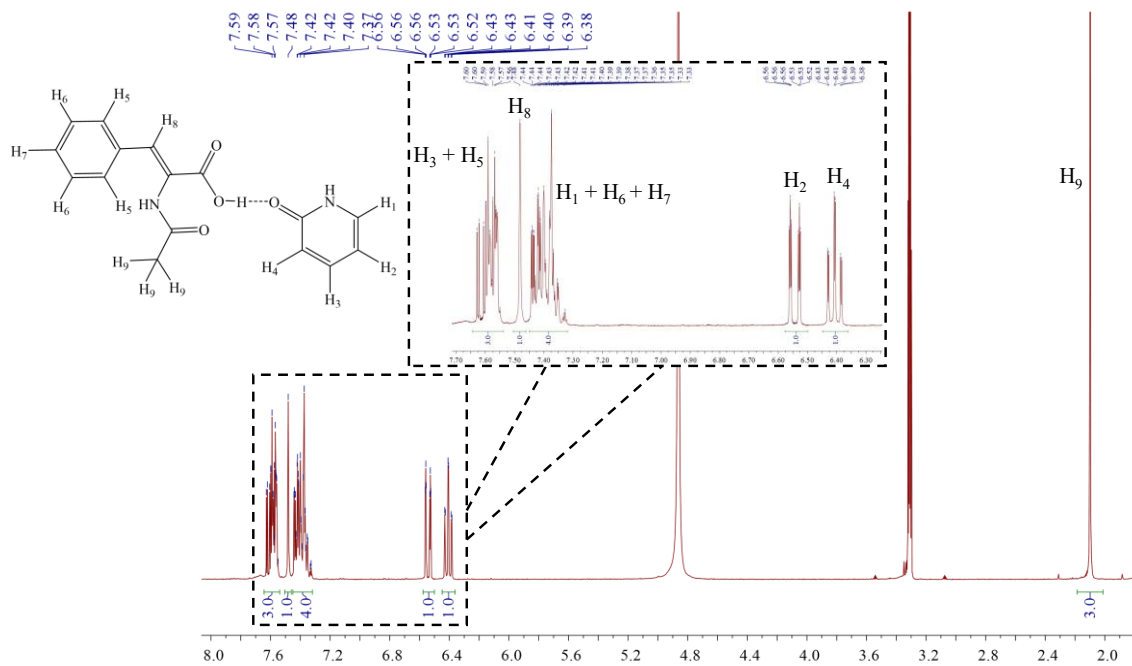

Figure S6. <sup>1</sup>H NMR spectrum of cocystal (HACA)(Pdon) (**2**) recorded at 298 K in CD<sub>3</sub>OD.

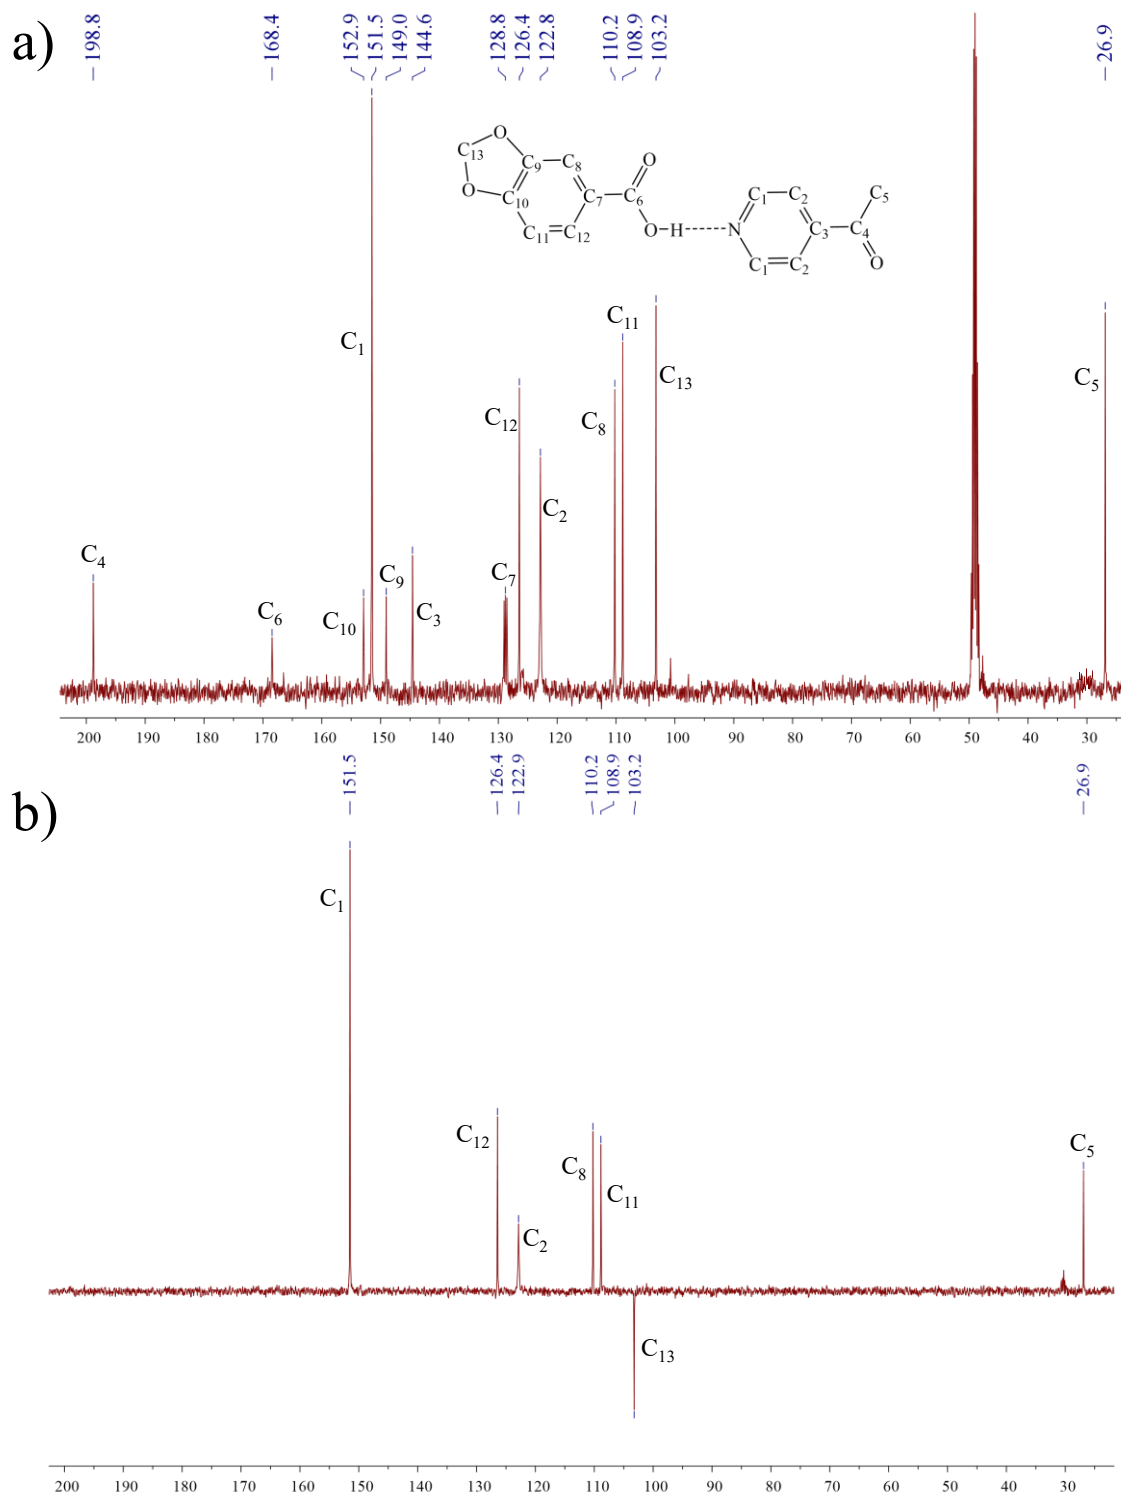

Figure S7. (a)  $^{13}\text{C}\{^1\text{H}\}$  and (b) DEPT-135 NMR spectra of cocystal (HPip)(4-Acpy) (**1**) recorded at 298 K in  $\text{CD}_3\text{OD}$ .

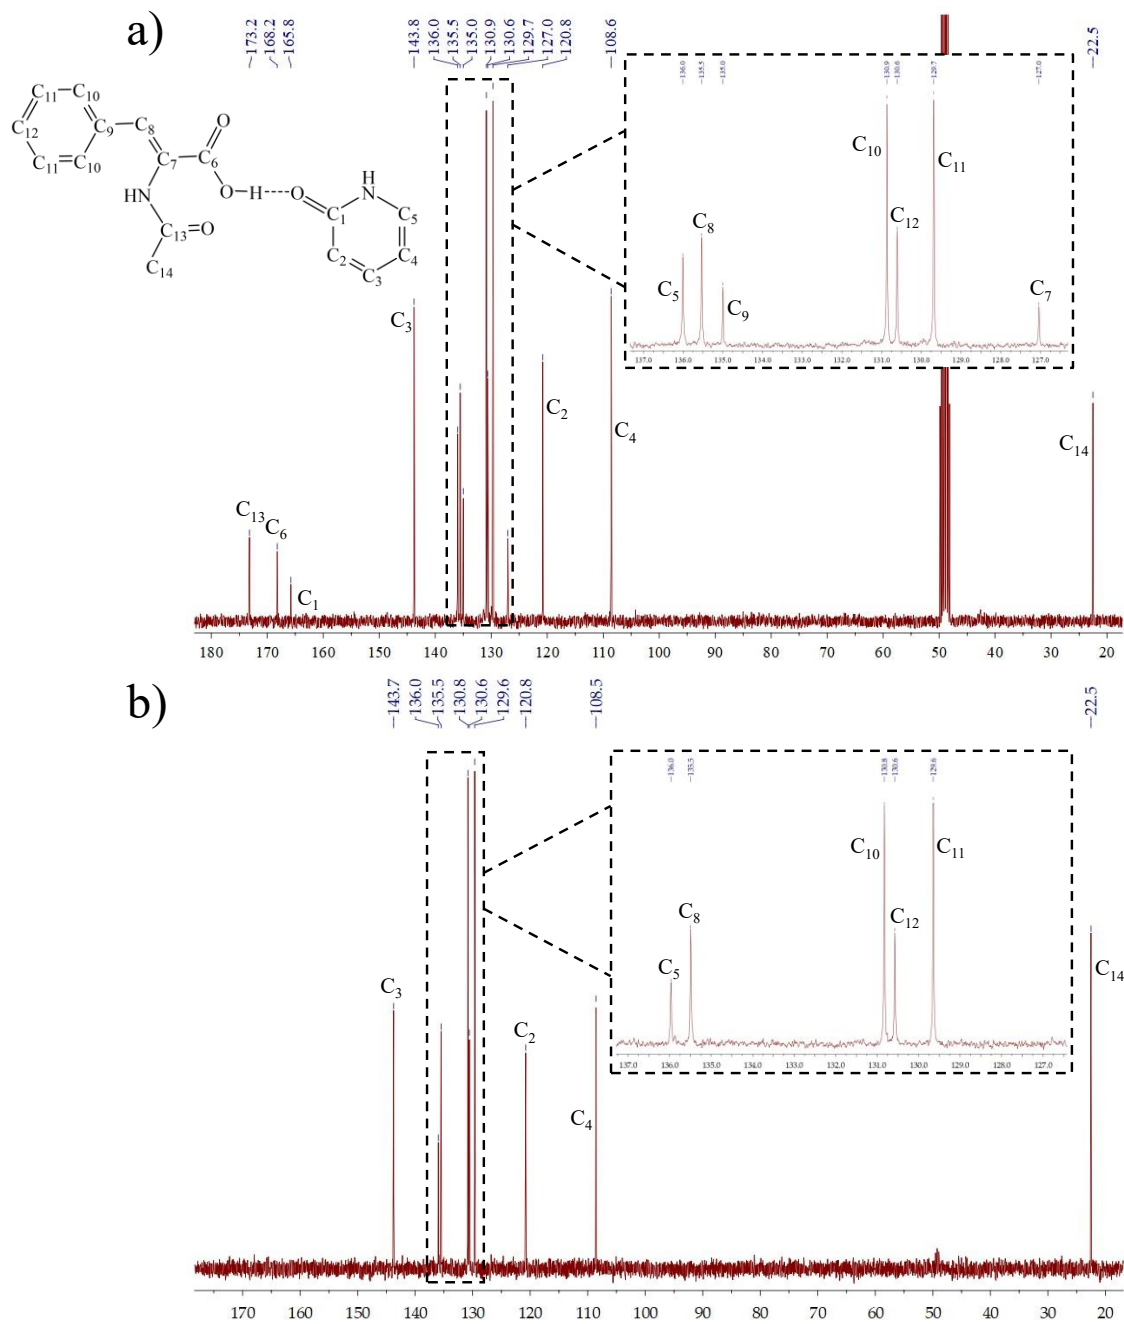

Figure S8. (a)  $^{13}\text{C}\{^1\text{H}\}$  and (b) DEPT-135 NMR spectra of cocrystal (HACA)(Pdon) (**2**) recorded at 298 K in  $\text{CD}_3\text{OD}$ .

## Hirshfeld Surface Analysis

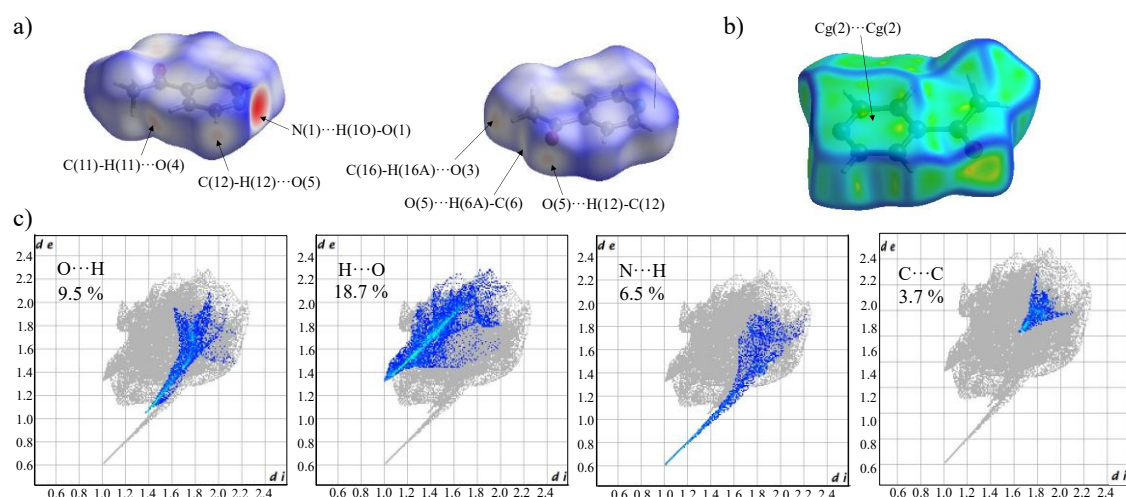

Figure S9. Hirshfeld surfaces of 4-AcPy in cocystal **1** mapped with (a)  $d_{\text{norm}}$  and (b) curvedness representations. (c) 2D fingerprint plots of 4-AcPy in cocystal **1**. Relevant supramolecular interactions have been highlighted in the Hirshfeld surface representations.

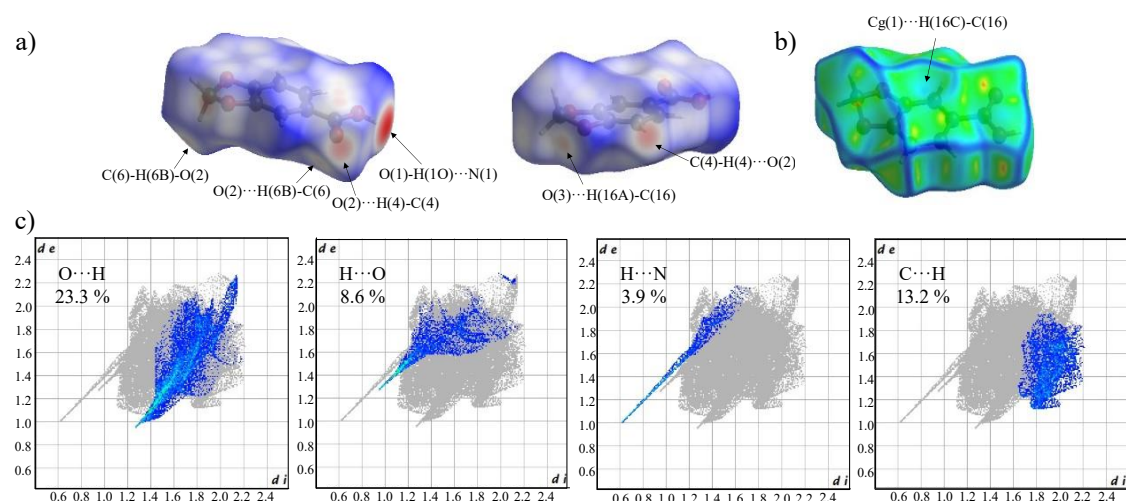

Figure S10. Hirshfeld surfaces of HPip in cocystal **1** mapped with (a)  $d_{\text{norm}}$  and (b) curvedness representations. (c) 2D fingerprint plots of HPip in cocystal **1**. Relevant supramolecular interactions have been highlighted in the Hirshfeld surface representations.



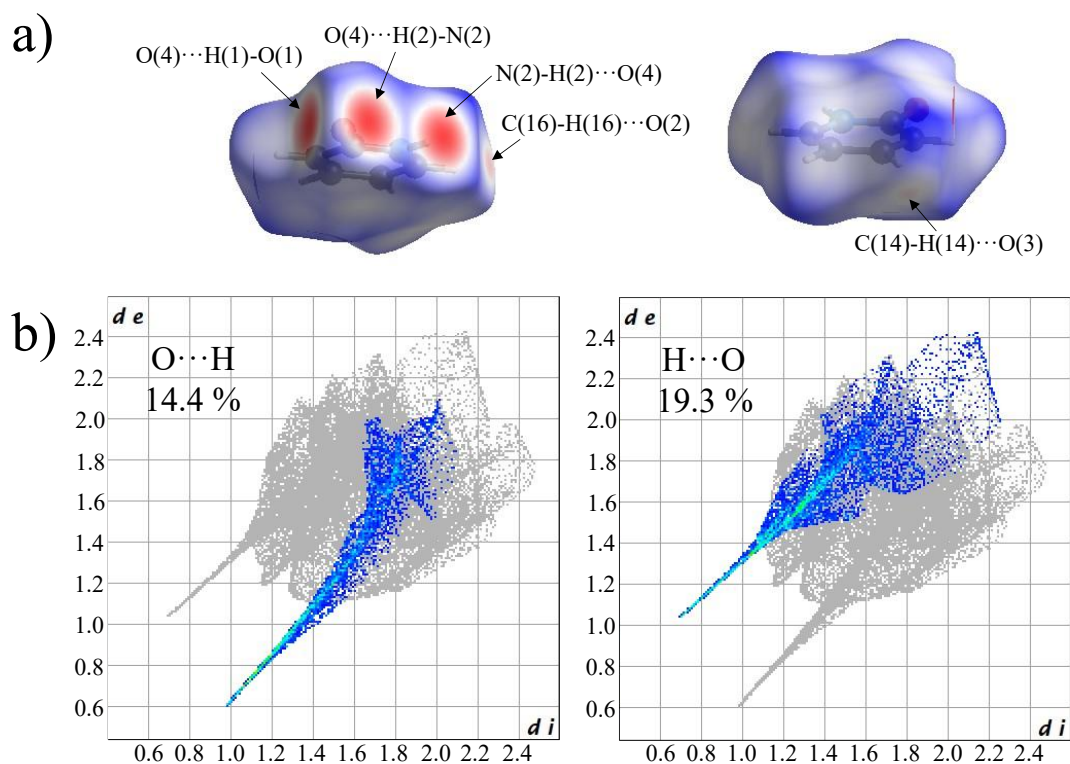

Figure S11. (a) Hirshfeld surfaces mapped with  $d_{\text{norm}}$  of Pdon in **2**. (b) 2D fingerprint plots of Pdon in cocrystal **2**. Relevant supramolecular interactions have been highlighted in the Hirshfeld surface representations.

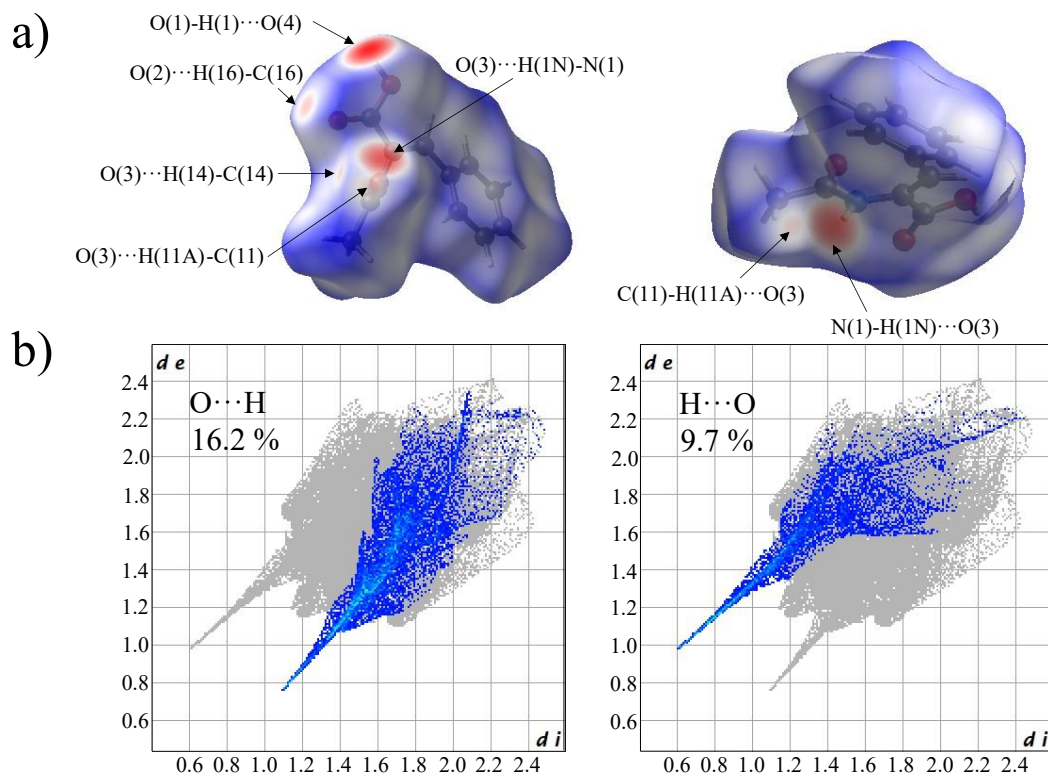

Figure S12. (a) Hirshfeld surfaces mapped with  $d_{\text{norm}}$  of HACA in **2**. (b) 2D fingerprint plots of HACA in cocrystal **2**. Relevant supramolecular interactions have been highlighted in the Hirshfeld surface representations.



## Topological Analysis

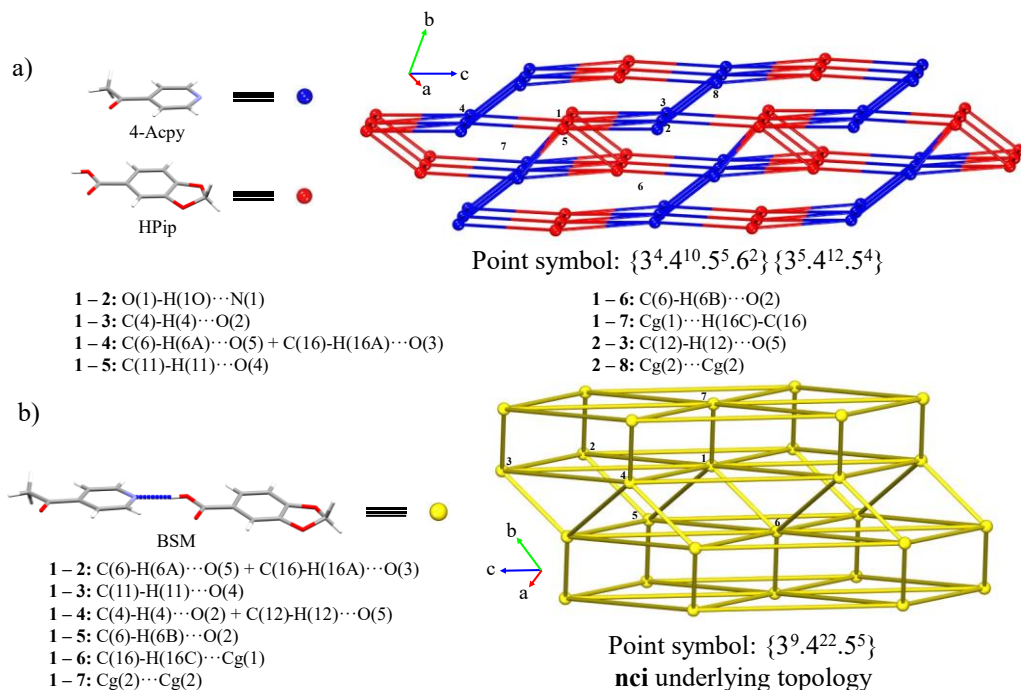

Figure S13. Schematic representation of the underlying topologies of cocrystal 1 considering (a) HPip and 4-AcPy as nodes. (b) BSM as node. The list of supramolecular interactions associated to each edge is provided for both simplifications.

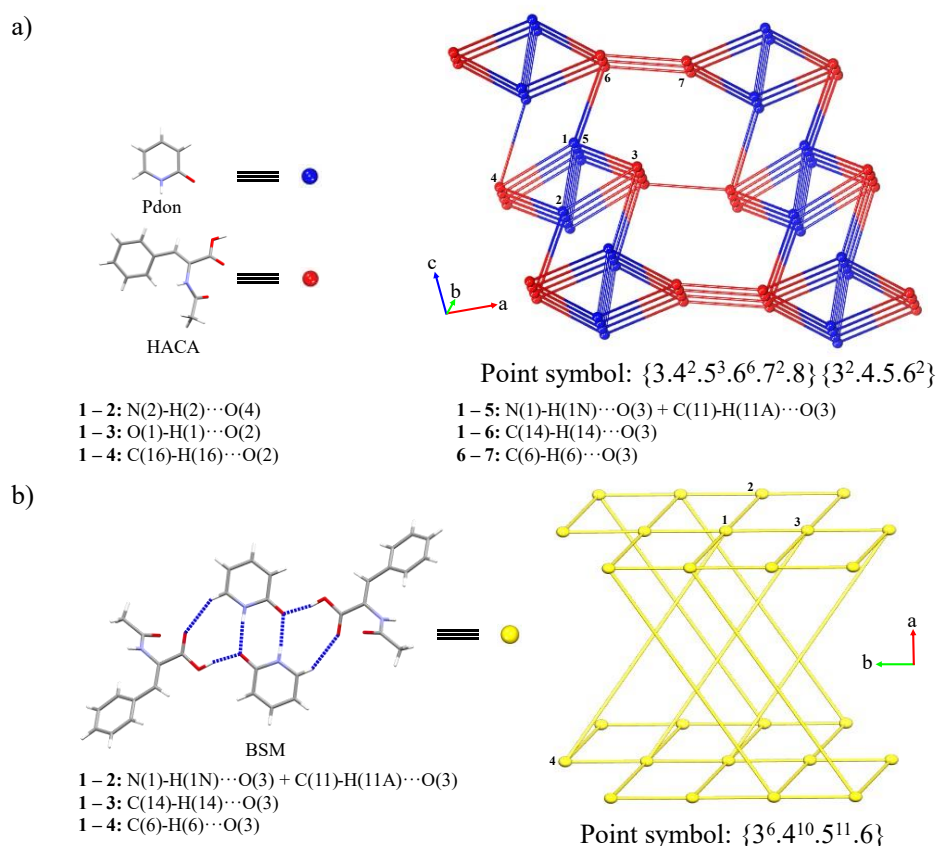

Figure S14. Schematic representation of the underlying topologies of cocrystal 2 considering (a) HACA and Pdon as nodes. (b) BSM as node. The list of supramolecular interactions associated to each edge is provided for both simplifications.

## Cambridge Structural Database results

Table S1. CSD results of the selected cocrystal structures presenting the acid...4-Acpy heterosynthon.

| CSD Code | Coformer                                                                            | Strong Synthons                                  | Dimensionality considering strong synthons | Weak interactions                          | Dimensionality considering weak interactions | Ref       |
|----------|-------------------------------------------------------------------------------------|--------------------------------------------------|--------------------------------------------|--------------------------------------------|----------------------------------------------|-----------|
|          | 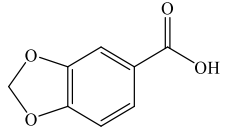   | Acid...Pyridine                                  | 0D dimer                                   | C-H...O<br>C-H... $\pi$<br>$\pi$ ... $\pi$ | 3D                                           | This work |
| FEXSEJ   |    | Acid...Pyridine<br>Amine...Amine<br>Acid...Amine | 2D                                         | C-H...O                                    | 3D                                           | 1         |
| HOLIAU06 |    | Acid...Pyridine                                  | 0D dimer                                   | C-H...O<br>$\pi$ ... $\pi$                 | 3D                                           | 2         |
| HOLIAU07 |                                                                                     | Acid...Pyridine                                  | 0D dimer                                   | C-H...O<br>C-H... $\pi$<br>$\pi$ ... $\pi$ | 3D                                           |           |
| HOZBOO   |    | Acid...Pyridine                                  | 0D trimer                                  | C-H...O<br>$\pi$ ... $\pi$                 | 3D                                           | 3         |
| RIGLAV   |   | Acid...Pyridine                                  | 1D                                         | C-H...O                                    | 3D                                           | 4         |
| KEBCON   |  | Acid...Pyridine<br>Acid...Amine                  | 2D                                         | C-H...O<br>$\pi$ ... $\pi$                 | 3D                                           | 5         |

Table S2. CSD results of the selected cocrystal structures presenting the Pdon...Pdon homosynthon supported by Pdon...acid heterosynthons.

| CSD Code | Coformer                                                                           | Strong Synthons                               | Dimensionality considering strong synthons | Weak interactions              | Dimensionality considering weak interactions | Ref       |
|----------|------------------------------------------------------------------------------------|-----------------------------------------------|--------------------------------------------|--------------------------------|----------------------------------------------|-----------|
|          | 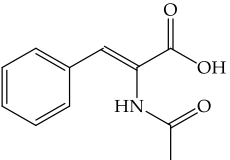  | Pdon...Acid<br>Amide...Amide                  | 2D                                         | -                              | -                                            | This work |
| AHASUX   |   | Pdon...Acid                                   | 0D tetramer                                | C-H...O                        | 2D                                           | 6         |
| AHATAE   |   | Pdon...Acid                                   | 0D tetramer                                | C-H...O and<br>$\pi$ ... $\pi$ | 3D                                           |           |
| AHATEI   |   | Pdon...Acid                                   | 0D tetramer                                | C-H...O and<br>$\pi$ ... $\pi$ | 1D                                           |           |
| AHATIM   |   | Pdon...Acid                                   | 0D tetramer                                | C-H...O and<br>C-H... $\pi$    | 3D                                           |           |
| FEDFUS   |  | Pdon...Acid,<br>Sulfonamide...<br>Sulfonamide | 2D                                         | -                              | -                                            |           |

Table S2. *Cont.*

| CSD Code | Coformer                                                                                                  | Strong Synthons                                                                 | Dimensionality considering strong synthons | Weak interactions | Dimensionality considering weak interactions | Ref |
|----------|-----------------------------------------------------------------------------------------------------------|---------------------------------------------------------------------------------|--------------------------------------------|-------------------|----------------------------------------------|-----|
| FOTYET   | 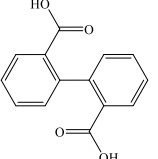                         | Pdon...Acid                                                                     | 1D                                         | -                 | -                                            | 8   |
| FURWIA02 |                          | Pdon...Acid,<br>Sulfonamide...<br>Sulfonamide,<br>Sulfonamide...Acid            | 3D                                         | -                 | -                                            | 9   |
| KARFER   |                          | Pdon...Acid                                                                     | 0D tetramer                                | C-H...O           | 3D                                           | 10  |
| QIMHOJ01 |                         | Pdon...Acid                                                                     | 1D                                         | C-H...O           | 2D                                           | 11  |
| NISTAK   |                        | Pdon...Acid                                                                     | 1D                                         | C-H...O           | 3D                                           |     |
| NISVUJ   | <br>+ H <sub>2</sub> O | Pdon...Acid,<br>H <sub>2</sub> O...H <sub>2</sub> O,<br>H <sub>2</sub> O...Acid | 3D                                         | -                 | -                                            |     |

Table S2. *Cont.*

| CSD Code | Coformer                                                                            | Strong Synthons                | Dimensionality considering strong synthons | Weak interactions            | Dimensionality considering weak interactions | Ref |
|----------|-------------------------------------------------------------------------------------|--------------------------------|--------------------------------------------|------------------------------|----------------------------------------------|-----|
| NITGUS   | 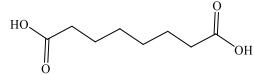   | Pdon...Acid                    | 1D                                         | C-H...O                      | 3D                                           | 11  |
| NITQIQ   |    | Pdon...Acid                    | 1D                                         | C-H...O                      | 2D                                           |     |
| PAHYUT   |    | Pdon...Acid,<br>Acid...Alcohol | 2D                                         | -                            | -                                            | 12  |
| QIMHUP   |    | Pdon...Acid                    | 1D                                         | -                            | -                                            | 13  |
| RIQXEX   |    | Pdon...Acid                    | 0D tetramer                                | $\pi \cdots \pi$             | 1D                                           | 14  |
| XASCUP   |    | Pdon...Acid                    | 1D                                         | C-H...O                      | 3D                                           | 15  |
| XASDAW   |    | Pdon...Acid                    | 1D                                         | C-H...O                      | 2D                                           |     |
| XUNHET   |   | Pdon...Acid                    | 1D                                         | C-H...O                      | 2D                                           | 16  |
| XUNHIX   |  | Pdon...Acid,<br>Acid...Acid    | 1D                                         | C-H...O                      | 3D                                           |     |
| XUNHOD   |  | Pdon...Acid                    | 1D                                         | -                            | -                                            |     |
| XUNHUJ   |  | Pdon...Acid,<br>Acid...Acid    | 1D                                         | C-H...O                      | 3D                                           |     |
| YOYXUI   |  | Pdon...Acid                    | 0D tetramer                                | C-H...O,<br>$\pi \cdots \pi$ | 3D                                           | 17  |

## Energy Frameworks

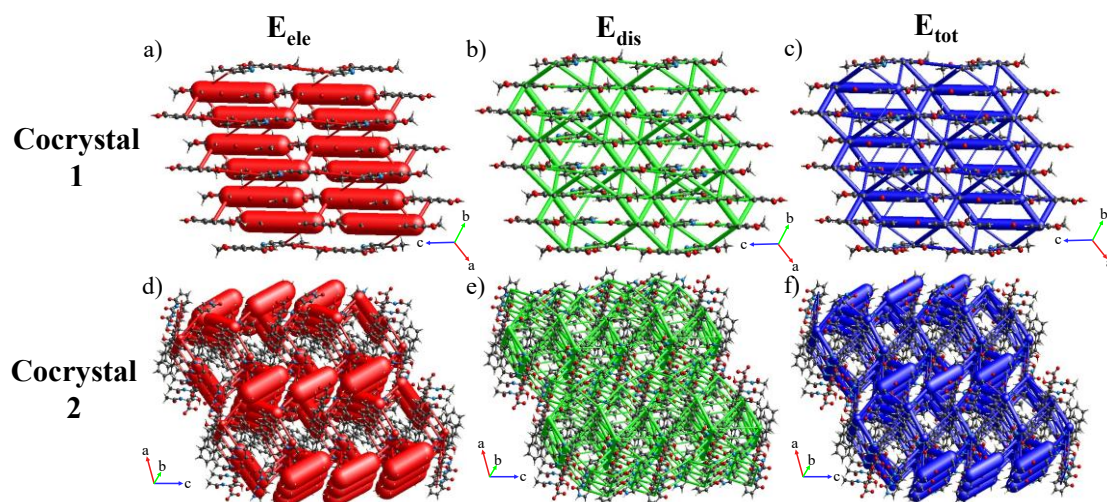

Figure S15. Energy frameworks ( $E_{ele}$ ,  $E_{dis}$ ,  $E_{tot}$ ) for cocrystals (a-c) **1** and (d-f) **2**. All the diagrams use the same energy cylinder scale factor of 150 and an energy cut-off of -7.80 KJ/mol within a  $3 \times 1 \times 2$  (**1**) and a  $2 \times 3 \times 2$  (**2**) unit cells.

Table S3. Contribution energies (electrostatic,  $E_{ele}$ ; polarization,  $E_{pol}$ ; dispersion,  $E_{dis}$ ; repulsion,  $E_{rep}$ ), total energies ( $E_{tot}$ ) and lattice energies ( $E_{latt}$ ) of cocrystals **1** and **2**<sup>a</sup>.

| Structure   | Molecule | $E_{ele}$ | $E_{pol}$ | $E_{dis}$ | $E_{rep}$ | $E_{tot}$ | $E_{latt}$ |
|-------------|----------|-----------|-----------|-----------|-----------|-----------|------------|
| Cocrystal 1 | HPip     | -173.8    | -30.5     | -194.5    | 168.2     | -230.6    | -211.0     |
|             | 4-Acpy   | -147.9    | -26.5     | -163.2    | 146.3     | -191.3    |            |
| Cocrystal 2 | HACA     | -247.9    | -53.4     | -125.2    | 185.8     | -240.7    | -274.2     |
|             | Pdon     | -226.2    | -50.8     | -223.7    | 193.1     | -307.6    |            |

<sup>a</sup>Energies are given in KJ/mol

## References

- 1 T. Daisy Rani, M. Rajkumar and A. Chandramohan, *Mater. Lett.*, 2018, **222**, 118–121.
- 2 L. H. Thomas, G. A. Craig, M. J. Gutmann, A. Parkin, K. Shankland and C. C. Wilson, *CrystEngComm*, 2011, **13**, 3349–3354.
- 3 K. Xu, B.-Y. Zhang, J.-J. Nie and D.-J. Xu, *Acta Cryst.*, 2009, **E65**, o1467–o1467.
- 4 S. Muniappan, S. Lipstman and I. Goldberg, *Acta Cryst.*, 2007, **C63**, o395–o399.
- 5 M. Singh, S. Anthal, P. J. Srijana, B. Narayana, B. K. Sarojini, U. Likhitha, Kamal and R. Kant, *J. Mol. Struct.*, 2022, **1262**, 133061.
- 6 T. Odani and A. Matsumoto, *CrystEngComm*, 2002, **4**, 467–471.
- 7 S. Allu, G. Bolla, S. Tothadi and A. Nangia, *Cryst. Growth Des.*, 2017, **17**, 4225–4236.
- 8 M. Telzhensky and M. Kaftory, *Acta Cryst.*, 2009, **C65**, o314–o320.
- 9 G. Bolla and A. Nangia, *Chem. Commun.*, 2015, **51**, 15578–15581.
- 10 G. Bolla, V. Chernyshev and A. Nangia, *IUCrJ*, 2017, **4**, 206–214.
- 11 C. Aakeröy, A. Beatty and M. Zou, *Cryst. Eng.*, 1998, **1**, 225–241.
- 12 T. Fukunaga, S. Kashino and H. Ishida, *Acta Cryst.*, 2004, **C60**, o718–o722.
- 13 S. Kashino, T. Fukunaga, H. Izutsu and S. Miyashita, *Acta Cryst.*, 2001, **C57**, 627–631.
- 14 S. Mittapalli, M. K. C. Mannava, R. Sahoo and A. Nangia, *Cryst. Growth Des.*, 2019, **19**, 219–230.
- 15 C. B. Aakeröy, A. M. Beatty, M. Nieuwenhuyzen and M. Zou, *Tetrahedron*, 2000, **56**, 6693–6699.
- 16 M. R. Edwards, W. Jones and W. D. S. Motherwell, *Cryst. Eng.*, 2002, **5**, 25–36.
- 17 S. Lukin, T. Stolar, M. Tireli, D. Barišić, M. di Michiel, K. Užarević and I. Halasz, *Croat. Chem. Acta*, 2017, **90**, 707–710.
